# Supplementary material for: Longitudinal Associations between Food Parenting Practices and Dietary Intake in Children: The Feel4Diabetes Study
Source: Nutrients. 2021 Apr 14;13(4):1298. doi: 10.3390/nu13041298 (PMC8071003; doi:10.3390/nu13041298)
Supplement: Supplementary file 1 [file nutrients-13-01298-s001.pdf]

## Supplementary Files

**Table S1.** Questions, response options, and analytic coding for the analyses. The Feel4Diabetes-study

| Questionnaire item                                                                                              | Response options             | Analytic coding                                                                                    |
|-----------------------------------------------------------------------------------------------------------------|------------------------------|----------------------------------------------------------------------------------------------------|
| <b>Children's dietary intake</b>                                                                                |                              |                                                                                                    |
| <b>Please indicate how often you and your child regularly consume the following foods and drinks.</b>           |                              |                                                                                                    |
| 1. Water (1 glass or 1 cup)                                                                                     |                              |                                                                                                    |
| 2. Fruits and berries, fresh or frozen (1 tennis ball-sized fruit, or 2 small fruits, or half a cup of chopped) |                              |                                                                                                    |
| 3. Fruits and berries, canned (half a cup) or dried (a quarter of a cup)                                        | 8 response options:          | A continuous variable indicating servings per day was created according to the frequency of intake |
| 4. Fruit juices, freshly squeezed or prepacked without sugar (1 glass or 1 cup)                                 | a. Less than once per week   | a. Less than 1 t/w = 0.14 s/d                                                                      |
| 5. Soft drinks and juices containing sugar (1 glass or 1 cup)                                                   | b. 1–2 times per week        | b. 1–2 times per week = 0.21 s/d                                                                   |
| 6. Soft drinks, diet (light) (1 glass or 1 cup)                                                                 | c. 3–4 times per week        | c. 3–4 t/w = 0.5 s/d                                                                               |
| 7. Vegetables (half a cup or the size of a tennis ball of tomato, broccoli, leafy vegetables, etc.)             | d. 5–6 times per week        | d. 5–6 t/w = 0.79 s/d                                                                              |
| 8. Sweets (1 chocolate bar or half a cup of sweets, cookies, or ice cream)                                      | e. 1–2 times per day         | e. 1–2 t/d = 1.5 s/d                                                                               |
| 9. Salty snacks/fast food (e.g. 1 small hamburger, 1 small bag of chips, 1 slice of pizza)                      | f. 3–4 times per day         | f. 3–4 t/d = 3.5 s/d                                                                               |
|                                                                                                                 | g. 5–6 times per day         | g. 5–6 t/d = 5.5 s/d                                                                               |
|                                                                                                                 | h. More than 6 times per day | h. >6 t/d = 6 s/d                                                                                  |
| <b>Food parenting practices</b>                                                                                 |                              |                                                                                                    |
| <b>On a weekly basis, how frequently are the following food items available in your home?</b>                   |                              |                                                                                                    |
| 1. Fruits                                                                                                       |                              |                                                                                                    |
| 2. Fruit juices, freshly-squeezed or prepacked without sugar                                                    | 5 response options:          |                                                                                                    |
| 3. Fruit juices, prepacked, containing sugar                                                                    | a. Always                    | Categories were recorded from never to always and afterwards recategorized into three groups:      |
| 4. Sugar juices                                                                                                 | b. Often                     | 1=Never/rarely                                                                                     |
| 5. Soft drinks containing sugar                                                                                 | c. Sometimes                 | 2= Sometimes                                                                                       |
| 6. Soft drinks without sugar                                                                                    | d. Rarely                    | 3=Often/always                                                                                     |
| 7. Vegetables                                                                                                   | e. Never                     |                                                                                                    |
| 8. Sweets, biscuits, ice cream, cakes, pastries                                                                 |                              |                                                                                                    |
| 9. Salty snacks (e.g. chips, savoury pastries)                                                                  |                              |                                                                                                    |
| <b>On a weekly basis, how often do you use the following practices:</b>                                         |                              |                                                                                                    |
| 10. How often do you consume fresh fruits with your child?                                                      | a. Very often                | Categories were recorded from never to very often and afterwards recategorized into three groups:  |
| 11. How often do you reward your child with sweets, salty snacks (e.g. potato chips), or fast food?             | b. Often                     | 1=Never/rarely                                                                                     |
| 12. How often do you allow your child to eat sweets and/or salty snacks whenever he/she asks for them?          | c. Sometimes                 | 2= Sometimes                                                                                       |
|                                                                                                                 | d. Rarely                    | 3=Often/Very often                                                                                 |
|                                                                                                                 | e. Never                     |                                                                                                    |

Bold text is as used in the questionnaire.

**Table S2.** Compliance with recommendations for dietary intake in children from the Feel4Diabetes-study at follow-up, n = 2967\*

| Nutrient-dense foods                    | Total       |             | Girls       |             | Boys        |             |
|-----------------------------------------|-------------|-------------|-------------|-------------|-------------|-------------|
|                                         | No          | Yes         | No          | Yes         | No          | Yes         |
| Water                                   | 84.0 (2491) | 16.0 (476)  | 84.7 (1265) | 15.3 (229)  | 83.2 (1226) | 16.8 (247)  |
| Fruits & berries                        | 48.4 (1435) | 51.6 (1532) | 48.5 (725)  | 51.5 (769)  | 48.2 (710)  | 51.8 (763)  |
| Canned fruits                           | 97.9 (2905) | 2.1 (62)    | 97.7 (1460) | 2.3 (34)    | 98.1 (1445) | 1.9 (28)    |
| 100% fruit juice                        | 87.0 (2582) | 13.0 (385)  | 88.7 (1325) | 11.3 (169)  | 85.3 (1257) | 14.7 (216)  |
| Vegetables                              | 52.8 (1568) | 47.2 (1399) | 53.1 (793)  | 46.9 (701)  | 52.6 (775)  | 47.4 (698)  |
| F&V <sup>1</sup>                        | 92.7 (2749) | 7.3 (218)   | 92.8 (1387) | 7.2 (107)   | 92.5 (1362) | 7.5 (111)   |
| F&V <sup>2</sup>                        | 91.6 (2717) | 8.4 (250)   | 92.0 (1374) | 8.0 (120)   | 91.2 (1343) | 8.8 (130)   |
| <b>Energy-dense/nutrient-poor foods</b> |             |             |             |             |             |             |
| Soft drinks & sugar juices              | 44.2 (1310) | 55.8 (1657) | 41.8 (625)  | 58.2 (869)  | 46.5 (685)  | 53.5 (788)  |
| Light soft drinks                       | 19.3 (574)  | 80.7 (2393) | 18.6 (278)  | 81.4 (1216) | 20.1 (296)  | 79.9 (1177) |
| Sweets                                  | 90.9 (2698) | 9.1 (269)   | 89.8 (1341) | 10.2 (153)  | 92.1 (1357) | 7.9 (116)   |
| Salty snacks & fast food*               | 62.3 (1557) | 37.7 (943)  | 60.6 (768)  | 39.4 (500)  | 64.0 (789)  | 36.0 (443)  |

\* N= 2967, except salty snacks N= 2500. Recommendations were based on the Irish Food Pyramid. F&V<sup>1</sup>: indicates the sum of servings of fresh or frozen fruit & berries, fresh fruit juices, and vegetables. F&V<sup>2</sup>: Same as in Fruits & vegetables<sup>1</sup> + canned fruits & berries.

Cut-off points for recommendations for healthy foods: water = 6 or more servings per day; fruits & berries, canned fruit, fresh fruit juice & vegetables = 1–2 servings per day, F&V<sup>1</sup> and F&V<sup>2</sup>= 5 or more servings per day and for unhealthy foods: 1 serving or less per week for each food item. (\*) Unhealthy foods like sweets, salty snacks, and fast food.

**Table S3.** Cross-sectional associations between food parenting practices and dietary intake in girls in servings/day at baseline.

|                           | Nutrient-dense foods      |                           |                          |                          |                           |                           | Energy-dense/nutrient-poor foods |                            |                          |                          |                          |
|---------------------------|---------------------------|---------------------------|--------------------------|--------------------------|---------------------------|---------------------------|----------------------------------|----------------------------|--------------------------|--------------------------|--------------------------|
|                           | Water                     | Fruits & berries          | Canned fruits & berries  | Fresh fruit juice        | Vegetables                | F&V <sup>1</sup>          | F&V <sup>2</sup>                 | Soft drinks & sugar juices | Light soft drinks        | Sweets                   | Salty snacks & fast food |
|                           | $\beta$ (p-value)         | $\beta$ (p-value)         | $\beta$ (p-value)        | $\beta$ (p-value)        | $\beta$ (p-value)         | $\beta$ (p-value)         | $\beta$ (p-value)                | $\beta$ (p-value)          | $\beta$ (p-value)        | $\beta$ (p-value)        | $\beta$ (p-value)        |
| <b>Positive FPP</b>       |                           |                           |                          |                          |                           |                           |                                  |                            |                          |                          |                          |
| HA Fruit                  | 0.007 (0.759)             | <b>0.282 (&lt;0.001)</b>  | 0.015 (0.552)            | 0.048 (0.052)            | <b>0.169 (&lt;0.001)</b>  | <b>0.263 (&lt;0.001)</b>  | <b>0.257 (&lt;0.001)</b>         | <b>-0.075 (0.004)</b>      | <b>-0.060 (0.020)</b>    | -0.012 (0.619)           | <b>-0.068 (0.012)</b>    |
| HA 100% fruit juice       | 0.003 (0.891)             | <b>0.069 (0.013)</b>      | <b>0.088 (0.001)</b>     | <b>0.492 (&lt;0.001)</b> | <b>0.059 (0.021)</b>      | <b>0.217 (&lt;0.001)</b>  | <b>0.222 (&lt;0.001)</b>         | 0.024 (0.386)              | 0.029 (0.281)            | <b>-0.054 (0.032)</b>    | -0.007 (0.815)           |
| HA Vegetables             | 0.038 (0.117)             | <b>0.229 (&lt;0.001)</b>  | -0.013 (0.629)           | <b>0.028 (0.271)</b>     | <b>0.313 (&lt;0.001)</b>  | <b>0.299 (&lt;0.001)</b>  | <b>0.287 (&lt;0.001)</b>         | -0.016 (0.560)             | 0.011 (0.680)            | 0.042 (0.087)            | -0.044 (0.119)           |
| Modelling of fruit intake | <b>0.109 (&lt;0.001)</b>  | <b>0.431 (&lt;0.001)</b>  | <b>0.108 (&lt;0.001)</b> | <b>0.087 (&lt;0.001)</b> | <b>0.269 (&lt;0.001)</b>  | <b>0.418 (&lt;0.001)</b>  | <b>0.421 (&lt;0.001)</b>         | <b>-0.059 (0.022)</b>      | -0.003 (0.908)           | <b>-0.078 (0.001)</b>    | <b>-0.066 (0.014)</b>    |
| <b>Negative FPP</b>       |                           |                           |                          |                          |                           |                           |                                  |                            |                          |                          |                          |
| HA Sugar juices           | -0.045 (0.059)            | <b>-0.077 (0.004)</b>     | 0.040 (0.124)            | <b>0.072 (0.004)</b>     | <b>-0.064 (0.009)</b>     | -0.048 (0.070)            | -0.044 (0.100)                   | <b>0.393 (&lt;0.001)</b>   | 0.030 (0.263)            | <b>0.113 (&lt;0.001)</b> | <b>0.141 (&lt;0.001)</b> |
| HA Soft drinks            | <b>-0.082 (0.002)</b>     | <b>-0.061 (0.042)</b>     | -0.008 (0.788)           | 0.003 (0.917)            | <b>-0.106 (&lt;0.001)</b> | <b>-0.088 (0.003)</b>     | <b>-0.084 (0.005)</b>            | <b>0.367 (&lt;0.001)</b>   | 0.015 (0.605)            | <b>0.096 (&lt;0.001)</b> | <b>0.152 (&lt;0.001)</b> |
| HA Light soft drinks      | 0.012 (0.645)             | 0.010 (0.733)             | 0.011 (0.697)            | 0.036 (0.174)            | -0.040 (0.130)            | -0.003 (0.929)            | 0.000 (0.996)                    | 0.032 (0.256)              | <b>0.255 (&lt;0.001)</b> | 0.047 (0.073)            | <b>0.084 (0.005)</b>     |
| HA Sweets                 | -0.047 (0.070)            | <b>-0.100 (0.001)</b>     | <b>-0.075 (0.009)</b>    | <b>-0.082 (0.002)</b>    | <b>-0.080 (0.003)</b>     | <b>-0.124 (&lt;0.001)</b> | <b>-0.129 (&lt;0.001)</b>        | <b>0.106 (&lt;0.001)</b>   | 0.040 (0.159)            | <b>0.393 (&lt;0.001)</b> | <b>0.197 (&lt;0.001)</b> |
| HA Salty snacks           | -0.008 (0.768)            | <b>-0.099 (0.001)</b>     | -0.054 (0.068)           | -0.009 (0.749)           | <b>-0.092 (0.001)</b>     | <b>-0.105 (&lt;0.001)</b> | <b>-0.109 (&lt;0.001)</b>        | <b>0.110 (&lt;0.001)</b>   | 0.003 (0.923)            | <b>0.228 (&lt;0.001)</b> | <b>0.381 (&lt;0.001)</b> |
| Permissiveness            | <b>-0.061 (0.010)</b>     | <b>-0.146 (&lt;0.001)</b> | -0.049 (0.061)           | 0.032 (0.193)            | <b>-0.117 (&lt;0.001)</b> | <b>-0.126 (&lt;0.001)</b> | <b>-0.127 (&lt;0.001)</b>        | <b>0.178 (&lt;0.001)</b>   | 0.016 (0.543)            | <b>0.275 (&lt;0.001)</b> | <b>0.255 (&lt;0.001)</b> |
| Use of foods as reward*   | <b>-0.083 (&lt;0.001)</b> | <b>-0.060 (0.023)</b>     | 0.024 (0.348)            | 0.025 (0.317)            | <b>-0.099 (&lt;0.001)</b> | <b>-0.086 (0.001)</b>     | <b>-0.081 (0.002)</b>            | <b>0.144 (&lt;0.001)</b>   | 0.023 (0.366)            | <b>0.151 (&lt;0.001)</b> | <b>0.170 (&lt;0.001)</b> |

N= 1494, except salty snacks N = 1268. Linear regressions were performed individually (one for each practice) and were adjusted for country, group (control vs. intervention), parental education, sex, age, and BMI and children's gender, age, and z-BMI.  $\beta$  = Standardized coefficients; FPP, food parenting practices; HA, home availability. Boldface indicates statistical significance at  $p \leq 0.05$ . (\*) Energy-dense/nutrient-poor foods like sweets, salty snacks, and fast food.

**Table S4.** Cross-sectional associations between food parenting practices and dietary intake in boys in servings/day at baseline.

|                           |                 | Nutrient-dense foods |                         |                   |                 |                  |                  | Energy-dense/nutrient-poor foods |                   |                |                          |  |
|---------------------------|-----------------|----------------------|-------------------------|-------------------|-----------------|------------------|------------------|----------------------------------|-------------------|----------------|--------------------------|--|
|                           | Water           | Fruits & berries     | Canned fruits & berries | Fresh fruit juice | Vegetables      | F&V <sup>1</sup> | F&V <sup>2</sup> | Soft drinks & sugar juices       | Light soft drinks | Sweets         | Salty snacks & fast food |  |
|                           | β (p-value)     | β (p-value)          | β (p-value)             | β (p-value)       | β (p-value)     | β (p-value)      | β (p-value)      | β (p-value)                      | β (p-value)       | β (p-value)    | β (p-value)              |  |
| Positive FPP              |                 |                      |                         |                   |                 |                  |                  |                                  |                   |                |                          |  |
| HA Fruit                  | 0.033 (0.163)   | 0.321 (<0.001)       | 0.022 (0.409)           | 0.085 (0.001)     | 0.216 (<0.001)  | 0.322 (<0.001)   | 0.317 (<0.001)   | -0.068 (0.010)                   | 0.025 (0.349)     | 0.002 (0.926)  | -0.119 (<0.001)          |  |
| HA 100% fruit juice       | -0.040 (0.106)  | 0.106 (<0.001)       | 0.059 (0.029)           | 0.506 (<0.001)    | 0.093 (<0.001)  | 0.265 (<0.001)   | 0.270 (<0.001)   | -0.096 (<0.001)                  | 0.079 (0.004)     | -0.031 (0.218) | -0.023 (0.430)           |  |
| HA Vegetables             | 0.022 (0.364)   | 0.208 (<0.001)       | 0.031 (0.242)           | 0.078 (0.002)     | 0.319 (<0.001)  | 0.309 (<0.001)   | 0.306 (<0.001)   | 0.023 (0.378)                    | 0.004 (0.866)     | -0.003 (0.887) | -0.069 (0.015)           |  |
| Modelling of fruit intake | 0.059 (0.011)   | 0.448 (<0.001)       | 0.056 (0.027)           | 0.106 (<0.001)    | 0.234 (<0.001)  | 0.394 (<0.001)   | 0.393 (<0.001)   | -0.093 (<0.001)                  | 0.001 (0.959)     | -0.051 (0.032) | -0.088 (0.001)           |  |
| Negative FPP              |                 |                      |                         |                   |                 |                  |                  |                                  |                   |                |                          |  |
| HA Sugar juices           | -0.090 (<0.001) | -0.060 (0.021)       | 0.057 (0.024)           | 0.079 (0.001)     | -0.061 (0.013)  | -0.028 (0.279)   | -0.023 (0.384)   | 0.432 (<0.001)                   | 0.051 (0.046)     | 0.120 (<0.001) | 0.135 (<0.001)           |  |
| HA Soft drinks            | -0.069 (0.007)  | -0.159 (<0.001)      | 0.016 (0.565)           | 0.026 (0.337)     | -0.107 (<0.001) | -0.129 (<0.001)  | -0.122 (<0.001)  | 0.319 (<0.001)                   | 0.024 (0.388)     | 0.126 (<0.001) | 0.186 (<0.001)           |  |
| HA Light soft drinks      | -0.083 (0.001)  | -0.040 (0.160)       | -0.017 (0.536)          | 0.074 (0.006)     | -0.056 (0.038)  | -0.015 (0.592)   | -0.015 (0.601)   | 0.034 (0.233)                    | 0.208 (<0.001)    | 0.026 (0.322)  | 0.037 (0.230)            |  |
| HA Sweets                 | -0.053 (0.038)  | -0.095 (0.001)       | -0.096 (0.001)          | -0.016 (0.556)    | -0.060 (0.027)  | -0.082 (0.004)   | -0.092 (0.001)   | 0.149 (<0.001)                   | -0.023 (0.419)    | 0.393 (<0.001) | 0.195 (<0.001)           |  |
| HA Salty snacks           | -0.073 (0.005)  | -0.101 (0.001)       | -0.073 (0.010)          | 0.009 (0.758)     | -0.084 (0.002)  | -0.084 (0.004)   | -0.090 (0.002)   | 0.201 (<0.001)                   | -0.22 (0.445)     | 0.184 (<0.001) | 0.410 (<0.001)           |  |
| Permissiveness            | -0.072 (0.003)  | -0.128 (<0.001)      | -0.050 (0.055)          | -0.010 (0.691)    | -0.099 (<0.001) | -0.111 (<0.001)  | -0.117 (<0.001)  | 0.170 (<0.001)                   | 0.070 (0.009)     | 0.261 (<0.001) | 0.250 (<0.001)           |  |
| Use of foods as reward*   | -0.026 (0.260)  | -0.032 (0.222)       | 0.019 (0.467)           | -0.005 (0.854)    | -0.012 (0.630)  | -0.004 (0.886)   | -0.003 (0.904)   | 0.085 (0.001)                    | -0.005 (0.848)    | 0.145 (<0.001) | 0.150 (<0.001)           |  |

N= 1473, except salty snacks N= 1232. Linear regressions were performed individually (one for each practice) and were adjusted for country, group (control vs. intervention), parental education, sex, age, and BMI and children's gender, age, and z-BMI. β = Standardized coefficients; FPP, food parenting practices; HA, home availability. Boldface indicates statistical significance at  $p \leq 0.05$ . (\*) Energy-dense/nutrient-poor foods like sweets, salty snacks, and fast food.
